# Supplementary material for: ST-elevation myocardial infarction risk in the very elderly
Source: PubMed Central journal article supplement — BBA Clin. 2016 Sep 4;6:108–12. doi: 10.1016/j.bbacli.2016.09.001 (PMC5024138; doi:10.1016/j.bbacli.2016.09.001), 2016-09-04
Supplement: mmc1.pdf [file mmc1.pdf]

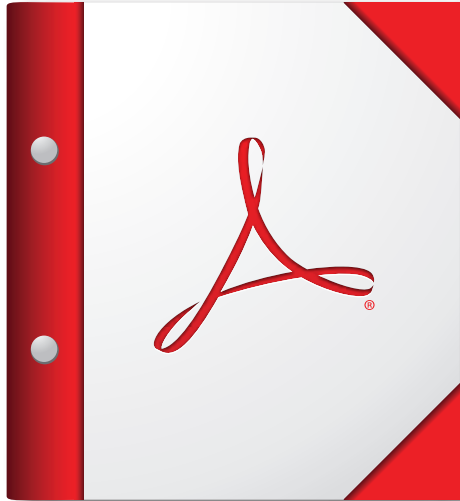

**For the best experience, open this PDF portfolio in  
Acrobat 9 or Adobe Reader 9, or later.**

[Get Adobe Reader Now!](#)
